# Supplementary material for: The Study of Misclassification Probability in Discriminant Model of Pattern Identification for Stroke
Source: Hindawi journal article supplement (doi:10.1155/2016/1912897), 2016-01-01
Supplement: f1 [file 1912897.f1.pdf]

**Supplemental table 1. Korean Standard PI for Stroke-3**

| Fire-heat pattern<br>(19 variable)    | Yin deficiency pattern<br>(7 variable)        | Qi deficiency pattern<br>(11 variable) | Dampness-phlegm pattern<br>(7 variable) |
|---------------------------------------|-----------------------------------------------|----------------------------------------|-----------------------------------------|
| 1. Reddened complexion                | 1. Pale face and red zygomatic-site           | 1. Pale complexion                     | 1. Sallow complexion                    |
| 2. Headache like flush                | 2. Tidal fever                                | 2. Looks powerless and lazy            | 2. Heavy                                |
| 3. Heat vexation and aversion to heat | 3. Thin                                       | 3. Feels powerless and lazy            | 3. Dark inferior palpebral              |
| 4. Heat vexation in the chest         | 4. Night sweating                             | 4. Reluctance to speak                 | 4. Dizziness with nausea                |
| 5. Vexation and insomnia              | 5. Dry mouth                                  | 5. Drowsiness, likes to lie down       | 5. (tongue) Enlarged tongue             |
| 6. Thirst                             | 6. (tongue) Bare and red tongue like a mirror | 6. Reversed cold in the extremities    | 6. (tongue) White fur on tongue         |
| 7. Wheezing in the throat with sputum | 7. (tongue) Dry fur on tongue                 | 7. (tongue) Pale tongue                | 7. (pulse) Slippery pulse               |
| 8. Blood-shot eyes                    |                                               | 8. (tongue) Teeth-marked tongue        |                                         |
| 9. Aphtha or tongue sore              |                                               | 9. (pulse) Weak pulse                  |                                         |
| 10. Heat in the palms and soles       |                                               | 10. (pulse) Fine pulse                 |                                         |
| 11. Vexing heat in the extremities    |                                               | 11. (pulse) Slow pulse                 |                                         |
| 12. Turbid urine                      |                                               |                                        |                                         |
| 13. Fetid mouth odor                  |                                               |                                        |                                         |
| 14. (tongue) Yellow fur               |                                               |                                        |                                         |
| 15. (tongue) Thick fur                |                                               |                                        |                                         |
| 16. (tongue) Red tongue               |                                               |                                        |                                         |
| 17. (pulse) Strong pulse              |                                               |                                        |                                         |
| 18. (pulse) Surging pulse             |                                               |                                        |                                         |
| 19. (pulse) Rapid pulse               |                                               |                                        |                                         |

PI, pattern identification;
